# Supplementary material
Source: publisher figshare collection journal article supplement (https://tandf.figshare.com/articles/dataset/_/24089719)

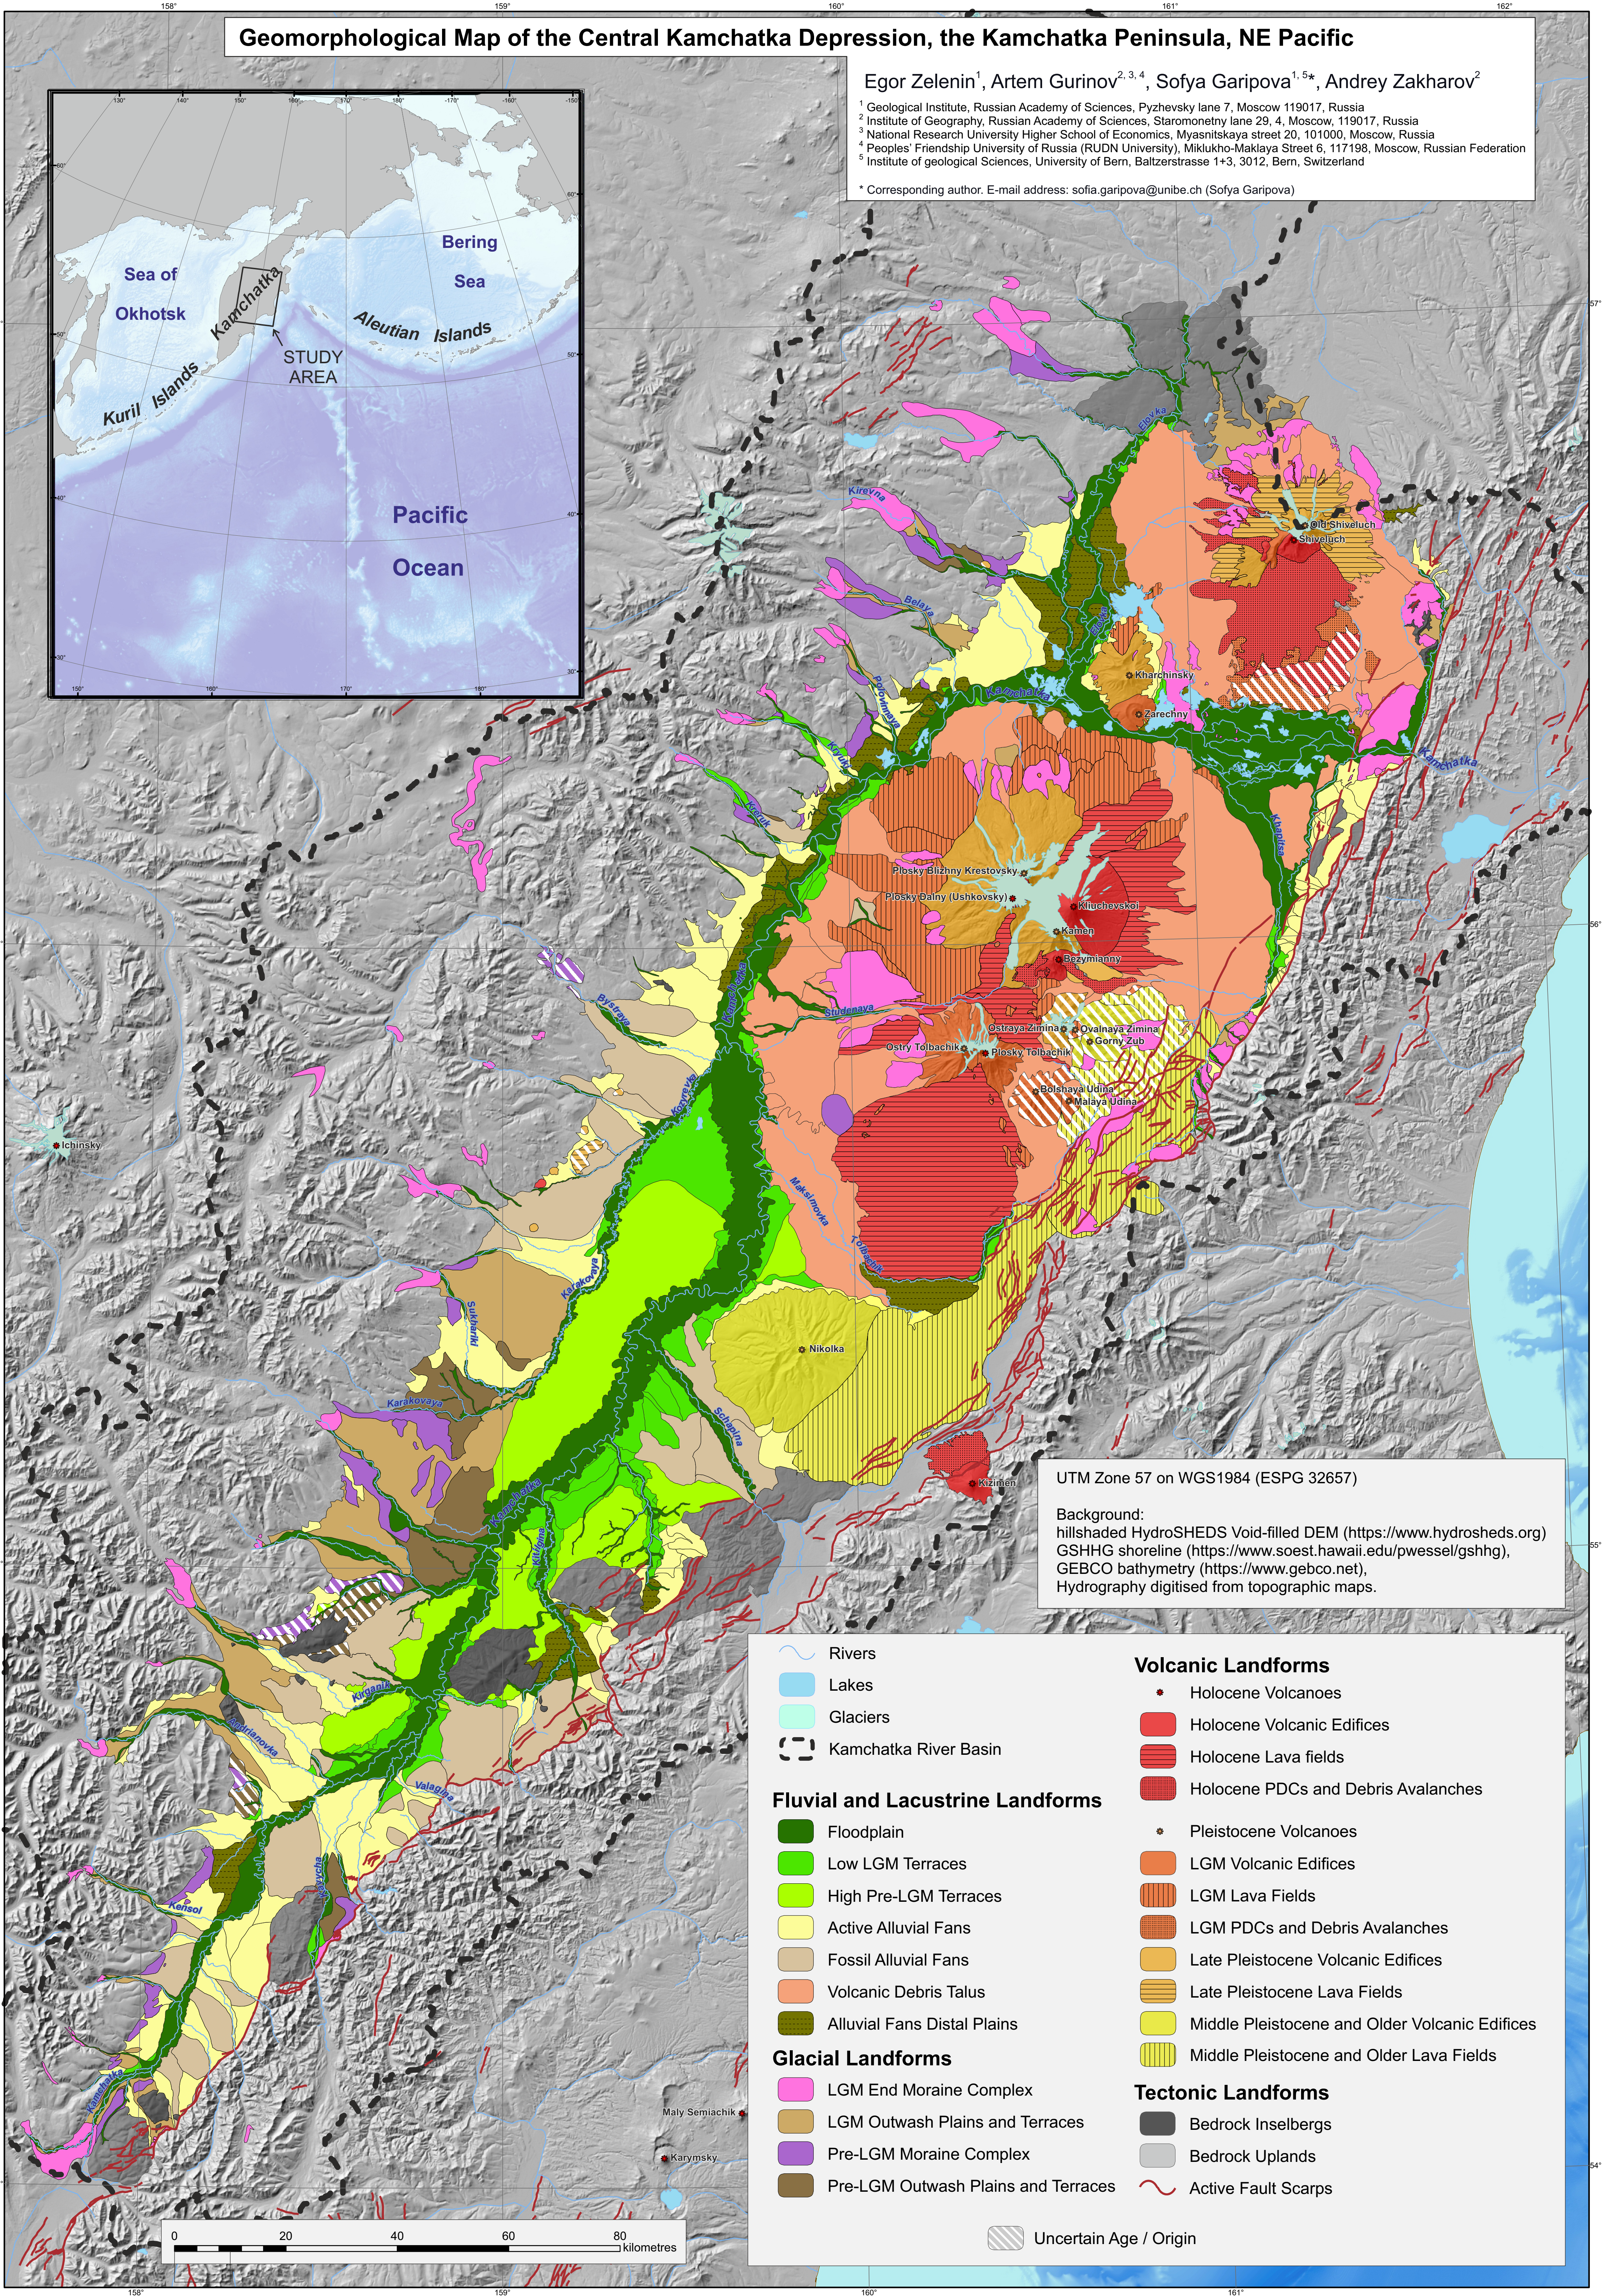

# Geomorphological Map of the Central Kamchatka Depression, the Kamchatka Peninsula, NE Pacific

Egor Zelenin<sup>1</sup>, Artem Gurinov<sup>2, 3, 4</sup>, Sofya Garipova<sup>1, 5\*</sup>, Andrey Zakharov<sup>2</sup>

<sup>1</sup> Geological Institute, Russian Academy of Sciences, Pyzhevsky lane 7, Moscow 119017, Russia  
<sup>2</sup> Institute of Geography, Russian Academy of Sciences, Staromonetny lane 29, 4, Moscow, 119017, Russia  
<sup>3</sup> National Research University Higher School of Economics, Myasnitskaya street 20, 101000, Moscow, Russia  
<sup>4</sup> Peoples' Friendship University of Russia (RUDN University), Miklukho-Maklaya Street 6, 117198, Moscow, Russian Federation  
<sup>5</sup> Institute of geological Sciences, University of Bern, Baltzerstrasse 1+3, 3012, Bern, Switzerland

\* Corresponding author. E-mail address: sofya.garipova@unibe.ch (Sofya Garipova)

UTM Zone 57 on WGS1984 (ESPG 32657)

Background:  
hillshaded HydroSHEDS Void-filled DEM (<https://www.hydrosheds.org>)  
GSHHG shoreline (<https://www.soest.hawaii.edu/pwessel/gshhg>),  
GEBCO bathymetry (<https://www.gebco.net>),  
Hydrography digitised from topographic maps.

- Rivers

Lakes

Glaciers

Kamchatka River Basin
- Fluvial and Lacustrine Landforms**

  - Floodplain
  - Low LGM Terraces
  - High Pre-LGM Terraces
  - Active Alluvial Fans
  - Fossil Alluvial Fans
  - Volcanic Debris Talus
  - Alluvial Fans Distal Plains

**Glacial Landforms**

  - LGM End Moraine Complex
  - LGM Outwash Plains and Terraces
  - Pre-LGM Moraine Complex
  - Pre-LGM Outwash Plains and Terraces
- Volcanic Landforms**

  - Holocene Volcanoes
  - Holocene Volcanic Edifices
  - Holocene Lava fields
  - Holocene PDCs and Debris Avalanches
  - Pleistocene Volcanoes
  - LGM Volcanic Edifices
  - LGM Lava Fields
  - LGM PDCs and Debris Avalanches
  - Late Pleistocene Volcanic Edifices
  - Late Pleistocene Lava Fields
  - Middle Pleistocene and Older Volcanic Edifices
  - Middle Pleistocene and Older Lava Fields

**Tectonic Landforms**

  - Bedrock Inselbergs
  - Bedrock Uplands
  - Active Fault Scarps

Uncertain Age / Origin

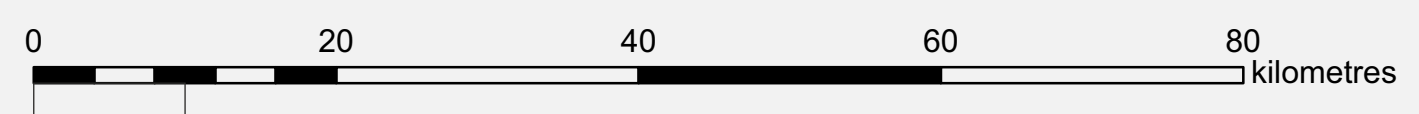

Supplement: Supplementary file 2 [file 1]
